# Supplementary material for: 12q21 Interstitial Deletions: Seven New Syndromic Cases Detected by Array-CGH and Review of the Literature
Source: MDPI journal article supplement (doi:10.3390/genes13050780), 2022-04-27
Supplement: s1 [file s1]

**Supplementary Table S1:** List of the most relevant coding genes in 12q21 region.

| HUMAN GENE SYMBOL | GENE FULL NAME                                 | MAIN BIOLOGICAL ACTIVITY                                                                          | OMIM DISEASE ASSOCIATION                                                                                                      | HI ≤ 10% [13] | pLI ≥ 0.9 [13,15] |
|-------------------|------------------------------------------------|---------------------------------------------------------------------------------------------------|-------------------------------------------------------------------------------------------------------------------------------|---------------|-------------------|
| ZFC3H1            | Zinc finger, C3H1-type containing              | Unknown                                                                                           |                                                                                                                               |               | X                 |
| TPH2              | Tryptophan hydroxylase 2                       | Biosynthesis of serotonin                                                                         | Susceptibility to: MAJOR DEPRESSIVE DISORDER (MDD) [608516]; ATTENTION DEFICIT-HYPERACTIVITY DISORDER type 7 (ADHD7) [613003] |               |                   |
| TRHDE             | Thyrotropin-releasing hormone degrading enzyme | Cleaves and inactivates the neuropeptide thyrotropin-releasing hormone                            |                                                                                                                               | X             |                   |
| KRR1              | Small subunit (SSU) processome component       | 40S ribosome biogenesis                                                                           |                                                                                                                               | X             |                   |
| NAP1L1            | Nucleosome assembly protein 1-like 1           | May be involved in modulating chromatin formation and cell proliferation                          |                                                                                                                               | X             | X                 |
| BBS10             | Bardet-Biedl syndrome 10                       | Assists the folding of proteins upon ATP hydrolysis                                               | BARDET-BIEDL SYNDROME 10 [615987]                                                                                             |               |                   |
| ZDHHC17           | Zinc finger, DHHC-type containing 17           | Palmitoyltransferase specific for a subset of neuronal proteins, including SYT1                   |                                                                                                                               | X             | X                 |
| E2F7              | E2F transcription factor 7                     | Regulates cell cycle progression                                                                  |                                                                                                                               |               | X                 |
| NAV3              | Neuron navigator 3                             | Belongs to neuron navigator family and is expressed predominantly in the nervous system           |                                                                                                                               |               | X                 |
| SYT1              | Synaptotagmin I                                | Interacts with membrane during trafficking of synaptic vesicles at the active zone of the synapse | BAKER-GORDON SYNDROME [618218]                                                                                                | X             |                   |
| PPP1R12A          | Protein phosphatase 1, regulatory subunit 12A  | Key regulator of protein phosphatase 1C (PPP1C). Mediates binding to myosin.                      | GENITOURINARY AND/OR BRAIN MALFORMATION SYNDROME [618820]                                                                     | X             | X                 |
| OTOGL             | Otogelin-like                                  | Expressed in the inner ear of vertebrates                                                         | DEAFNESS 84B [614944]                                                                                                         |               |                   |
| PTPRQ             | Protein tyrosine phosphatase, receptor type, Q | Phosphatidylinositol phosphatase required for auditory function                                   | DEAFNESS 73 [617663]; DEAFNESS 84 [613391]                                                                                    |               |                   |
| MYF6              | Myogenic factor 6 (herculin)                   | Probable basic helix-loop-helix DNA binding protein involved in muscle differentiation            |                                                                                                                               | X             |                   |

|                                                                                                                                                                                                                                                                        |                                                                                        |                                                                                         |                                                                                                                                 |   |   |
|------------------------------------------------------------------------------------------------------------------------------------------------------------------------------------------------------------------------------------------------------------------------|----------------------------------------------------------------------------------------|-----------------------------------------------------------------------------------------|---------------------------------------------------------------------------------------------------------------------------------|---|---|
| MYF5                                                                                                                                                                                                                                                                   | Myogenic factor 5                                                                      | Muscle differentiation                                                                  | OPHTHALMOPLEGIA, EXTERNAL, WITH RIB AND VERTEBRAL ANOMALIES [618155]                                                            | X |   |
| PPFIA2                                                                                                                                                                                                                                                                 | Protein tyrosine phosphatase, receptor type, F polypeptide (PTPRF) interacting protein | Regulator of higher-order brain functions in mammals                                    |                                                                                                                                 |   | X |
| TMTC2                                                                                                                                                                                                                                                                  | Transmembrane and tetratricopeptide repeat containing 2                                | Unknown                                                                                 |                                                                                                                                 | X |   |
| ALX1                                                                                                                                                                                                                                                                   | ALX homeobox 1                                                                         | Unknown                                                                                 | FRONTONASAL DYSPLASIA 3 [613456]                                                                                                | X |   |
| NTS                                                                                                                                                                                                                                                                    | Neurotensin                                                                            | Endocrine/paracrine role in the regulation of fat metabolism.                           |                                                                                                                                 | X |   |
| CEP290                                                                                                                                                                                                                                                                 | Centrosomal protein 290kDa                                                             | Localization of ciliary and photo-transduction proteins in retinal photoreceptor cells  | JOUBERT syndrome type 5 (JBTS5) [610188]; SENIOR-LOKEN syndrome type 6 (SLSN6) [610189]; MECKEL SYNDROME type 4 (MKS4) [611134] |   |   |
| TMTC3                                                                                                                                                                                                                                                                  | Transmembrane and tetratricopeptide repeat containing 3                                | Unknown                                                                                 | LISSENCEPHALY 8 [617255]                                                                                                        |   |   |
| KITLG                                                                                                                                                                                                                                                                  | KIT ligand                                                                             | Regulation of cell survival and proliferation                                           | DEAFNESS 69 UNILATERAL OR ASYMMETRIC [616697]                                                                                   | X |   |
| DUSP6                                                                                                                                                                                                                                                                  | Dual specificity phosphatase 6                                                         | Negative regulator of members of the mitogen-activated protein (MAP) kinase superfamily | HYPOGONADOTROPIC HYPOGONADISM 19 WITH OR WITHOUT ANOSMIA [615269]                                                               | X | X |
| ATP2B1                                                                                                                                                                                                                                                                 | ATPase, Ca <sup>++</sup> transporting, plasma membrane 1                               | Intracellular calcium homeostasis                                                       |                                                                                                                                 | X | X |
| KERA                                                                                                                                                                                                                                                                   | Keratocan                                                                              | Keratan sulfate proteoglycan involved in corneal transparency                           | CORNEA PLANA 2 [217300]                                                                                                         |   |   |
| DCN                                                                                                                                                                                                                                                                    | Decorin                                                                                | Collagen fibril assembly                                                                | CORNEAL DYSTROPHY [610048]                                                                                                      | X |   |
| Gene symbol and full name, main known biological activity [12], OMIM disease association [14], if applicable, HI score $\leq 10\%$ and/or pLI score $\geq 0.9$ [13,15] (see the main text for the listed criteria). Genes mentioned in the main text are in bold font. |                                                                                        |                                                                                         |                                                                                                                                 |   |   |

12. UCSC Genome Browser. Available online: <http://genome-euro.ucsc.edu/index.html> (accessed on 15 January 2022).
13. DECIPHER. Available on line: <https://www.deciphergenomics.org/> (accessed on 15 January 2022).
14. OMIM. Available online: <https://www.omim.org/> (accessed on 15 January 2022).
15. gnomAD. Available online: <https://gnomad.broadinstitute.org/> (accessed on 15 January 2022).
